# Supplementary material
Source: PubMed Central journal article supplement (PMC10449353)

## Supplementary Data

### Survey

| Areas                                                                                                 | Survey Questions                                                                                                                                                                                                                                                                                                                                       |
|-------------------------------------------------------------------------------------------------------|--------------------------------------------------------------------------------------------------------------------------------------------------------------------------------------------------------------------------------------------------------------------------------------------------------------------------------------------------------|
| Balance between service provision and training within a hospital or across different hospitals<br>(8) | 1. The cross-campus movement restriction has affected my training.<br>(Strongly Agree/Agree/Neutral/Disagree/Strongly Disagree)                                                                                                                                                                                                                        |
|                                                                                                       | 2. Are you currently doing an interim posting outside your originally planned posting for residency due to cross campus movement restriction?<br>(Y – go to #3 /N – go to #4)                                                                                                                                                                          |
|                                                                                                       | 3. If you have answered Y to #2 ><br>There are opportunities for me to explore the current training site in depth.<br>(Strongly Agree/Agree/Neutral/Disagree/Strongly Disagree)                                                                                                                                                                        |
|                                                                                                       | 4. Have you been deployed by MOHH for duties in community COVID-19 facilities?<br>(Y – go to #5 /N – go to #7)                                                                                                                                                                                                                                         |
|                                                                                                       | 5. If you have answered Y to #4 ><br>The deployment experience has provided me the opportunity to learn about<br>(i) Resource management<br>(ii) Interpersonal and communication skills<br>(iii) Ethics and professionalism<br>(iv) Technologies and electronic resources<br>For each item > (Strongly Agree/Agree/Neutral/Disagree/Strongly Disagree) |
|                                                                                                       | 6. I received adequate supervision while serving in community COVID-19 facilities.<br>(Strongly Agree/Agree/Neutral/Disagree/Strongly Disagree)                                                                                                                                                                                                        |
|                                                                                                       | 7. Faculty supervision has been reduced during this period of pandemic.<br>(Strongly Agree/Agree/Neutral/Disagree/Strongly Disagree)                                                                                                                                                                                                                   |
|                                                                                                       | 8. I have been well-supported during the pandemic to ensure that training progression do not get delayed. (Strongly Agree/Agree/Neutral/Disagree/Strongly Disagree)                                                                                                                                                                                    |
| Impact of the pandemic on examinations and teachings (6)                                              | 9. What is the extent that the usual teaching methods in your training programme been replaced with an alternative method (e.g., virtual)?<br>(100%/75%/50%/25%/0%)                                                                                                                                                                                    |
|                                                                                                       | 10. Teaching via video-conferencing has the same value as face-to-face teaching sessions. (Strongly Agree/Agree/Neutral/Disagree/Strongly Disagree)                                                                                                                                                                                                    |
|                                                                                                       | 11. Simulation training can be carried out using solely video-conferencing.<br>(Strongly Agree/Agree/Neutral/Disagree/Strongly Disagree)                                                                                                                                                                                                               |

| Areas                                                              | Survey Questions                                                                                                                                                                                                                                                                                                                                                                                                                                                                                                                                                                                                                                                                                     |
|--------------------------------------------------------------------|------------------------------------------------------------------------------------------------------------------------------------------------------------------------------------------------------------------------------------------------------------------------------------------------------------------------------------------------------------------------------------------------------------------------------------------------------------------------------------------------------------------------------------------------------------------------------------------------------------------------------------------------------------------------------------------------------|
|                                                                    | <p>12. <u>Rank</u> the following factors in order of importance to you, when teachings/workshops are conducted via a mixture of online (e.g., video-conferencing with faculty, e-Lectures) and offline learning (e.g., readings, quizzes, reflections).</p> <p>(i) Learning outcomes (e.g., content)</p> <p>(ii) Time-saving</p> <p>(iii) Convenience</p> <p>(iv) Administrative/Tech support</p>                                                                                                                                                                                                                                                                                                    |
|                                                                    | <p>13. Where the programme has to modify the usual mode of teaching, I feel that there has been sufficient administrative support. (Strongly agree/ Agree/ Neutral/ Disagree/ Strongly Disagree)</p>                                                                                                                                                                                                                                                                                                                                                                                                                                                                                                 |
|                                                                    | <p>14. The communication of information regarding training have been efficient. (Strongly Agree/Agree/Disagree/Strongly Disagree)</p>                                                                                                                                                                                                                                                                                                                                                                                                                                                                                                                                                                |
|                                                                    | <p>15. Overall, my training has been well-supported during this time. (Strongly Agree/Agree/Neutral/Disagree/Strongly Disagree)</p>                                                                                                                                                                                                                                                                                                                                                                                                                                                                                                                                                                  |
|                                                                    | <p>16. The opportunity to experience this healthcare crisis provides more meaning in my career. (Strongly Agree/Agree/Neutral/Disagree/Strongly Disagree)</p>                                                                                                                                                                                                                                                                                                                                                                                                                                                                                                                                        |
|                                                                    | <p>17. I feel stressed during this period of pandemic. (Strongly Agree/Agree/Neutral/Disagree/Strongly Disagree)</p>                                                                                                                                                                                                                                                                                                                                                                                                                                                                                                                                                                                 |
|                                                                    | <p>18. The postponement or cancellation of examinations added anxiety to me. (Strongly Agree/Agree/Neutral/Disagree/Strongly Disagree)</p>                                                                                                                                                                                                                                                                                                                                                                                                                                                                                                                                                           |
| Psychological impact, level of burnout and morale in residents (7) | <p>19. I feel that my workload was more than usual during this period of time. (Strongly Agree/Agree/Disagree/Strongly Disagree)</p> <p>20. <u>Rank</u> in order, which factor will give rise to stress for you.</p> <p>(i) Patient-related</p> <p>(ii) Relationships at workplace</p> <p>(iii) Family needs (e.g., provision for young children, elderly parents, spouse, etc)</p> <p>(iv) Concerns about family's health and safety (pertaining to potential COVID 19 infection)</p> <p>(v) Personal health (e.g., existing concerns, pertaining to potential COVID 19 infection)</p> <p>(vi) Lack of sleep/rest</p> <p>(vii) Progression in training</p> <p>(viii) Completion of examinations</p> |

| Areas          | Survey Questions                                                                                                                       |
|----------------|----------------------------------------------------------------------------------------------------------------------------------------|
|                | (ix) Lack of safety in training environment                                                                                            |
|                | 21. Based on your own experience, pick the factor(s) that were MOST aggravated for you during this pandemic period. Choose at least 1. |
|                | (i) Patient-related                                                                                                                    |
|                | (ii) Relationships at workplace                                                                                                        |
|                | (iii) Family needs (e.g., provision for young children, elderly parents, spouse, etc)                                                  |
|                | (iv) Concerns about family's health and safety (pertaining to potential COVID 19 infection)                                            |
|                | (v) Personal health (e.g., existing concerns, pertaining to potential COVID 19 infection)                                              |
|                | (vi) Lack of sleep/rest                                                                                                                |
|                | (vii) Progression in training                                                                                                          |
|                | (viii) Completion of examinations                                                                                                      |
|                | (ix) Lack of safety in training environment                                                                                            |
| Open ended (2) | 22. In your opinion, what will residency training be like in the new norm?                                                             |
|                | 23. Any other thoughts/comments you'd like to share.                                                                                   |
|                | 24. Which is your Residency training programme?                                                                                        |
|                | 25. Which Residency year are you at now?                                                                                               |
| Demographics   | 26. State your gender (M/F)                                                                                                            |
| (6)            | 27. State your age range (21 – 25 / 26 – 30 / 31 – 35 / 36 – 40/>40)                                                                   |
|                | 28. State your marital status (Single/Married/Others)                                                                                  |
|                | 29. How many children do you have? (0, 1, 2, 3, 4 or more)                                                                             |

Koh SJG, Woon TH, Fong W, et al. Residents' report of COVID-19 associated training disruptions, stressors, and opportunities during the pandemic—the Singapore experience. *J Grad Med Educ.* 2023;15(4):494-499. DOI: <http://dx.doi.org/10.4300/c>

**Demographic data of residents who responded to the online survey (N=253)**

| Characteristics                       | Number (%) |
|---------------------------------------|------------|
| Females                               | 140 (55.3) |
| Age range                             |            |
| 21-25                                 | 3 (1.2)    |
| 26-30                                 | 94 (37.2)  |
| 31-35                                 | 140 (55.3) |
| 36-40                                 | 16 (6.3)   |
| Marital status                        |            |
| Single                                | 118 (46.6) |
| Married                               | 131 (51.8) |
| Others                                | 4 (1.6)    |
| Number of children                    |            |
| None                                  | 186 (73.5) |
| One                                   | 41 (16.2)  |
| Two                                   | 25 (9.9)   |
| Three                                 | 1 (0.4)    |
| Residency programme                   |            |
| Internal Medicine                     | 84 (33.2)  |
| Paediatrics                           | 26 (10.3)  |
| Family Medicine                       | 23 (9.1)   |
| Anaesthesiology                       | 18 (7.1)   |
| Emergency Medicine                    | 17 (6.7)   |
| Obstetrics & Gynaecology              | 16 (6.3)   |
| Pathology                             | 14 (5.5)   |
| Diagnostic Radiology                  | 12 (4.7)   |
| General Surgery                       | 11 (4.7)   |
| Orthopaedic, Plastic and Hand Surgery | 10 (4.7)   |
| Neurology                             | 7 (2.8)    |
| Cardiology                            | 6 (2.4)    |
| Medical Oncology                      | 5 (2.0)    |
| Ophthalmology                         | 4 (1.6)    |
| Year of residency                     |            |
| PGY-1 to PGY-3                        | 143 (56.5) |
| PGY-4 to PGY-6                        | 110 (43.5) |

Koh SJG, Woon TH, Fong W, et al. Residents' report of COVID-19 associated training disruptions, stressors, and opportunities during the pandemic—the Singapore experience. *J Grad Med Educ.* 2023;15(4):494-499. DOI: <http://dx.doi.org/10.4300/c>

Demographic data of the entire residency cohort (N=934)

| Characteristics                       | Percentage |
|---------------------------------------|------------|
| Female                                | 51.8       |
| Residency programme                   |            |
| Internal Medicine                     | 31.7       |
| Paediatrics                           | 9.0        |
| Family Medicine                       | 9.3        |
| Anaesthesiology                       | 7.3        |
| Emergency Medicine                    | 5.2        |
| Obstetrics & Gynaecology              | 5.5        |
| Pathology                             | 1.7        |
| Diagnostic Radiology                  | 7.7        |
| General Surgery                       | 7.2        |
| Orthopaedic, Plastic and Hand Surgery | 5.8        |
| Neurology                             | 3.4        |
| Cardiology                            | 2.5        |
| Medical Oncology                      | 1.1        |
| Ophthalmology                         | 2.7        |

Weighted scores of stressors (independent of the pandemic)

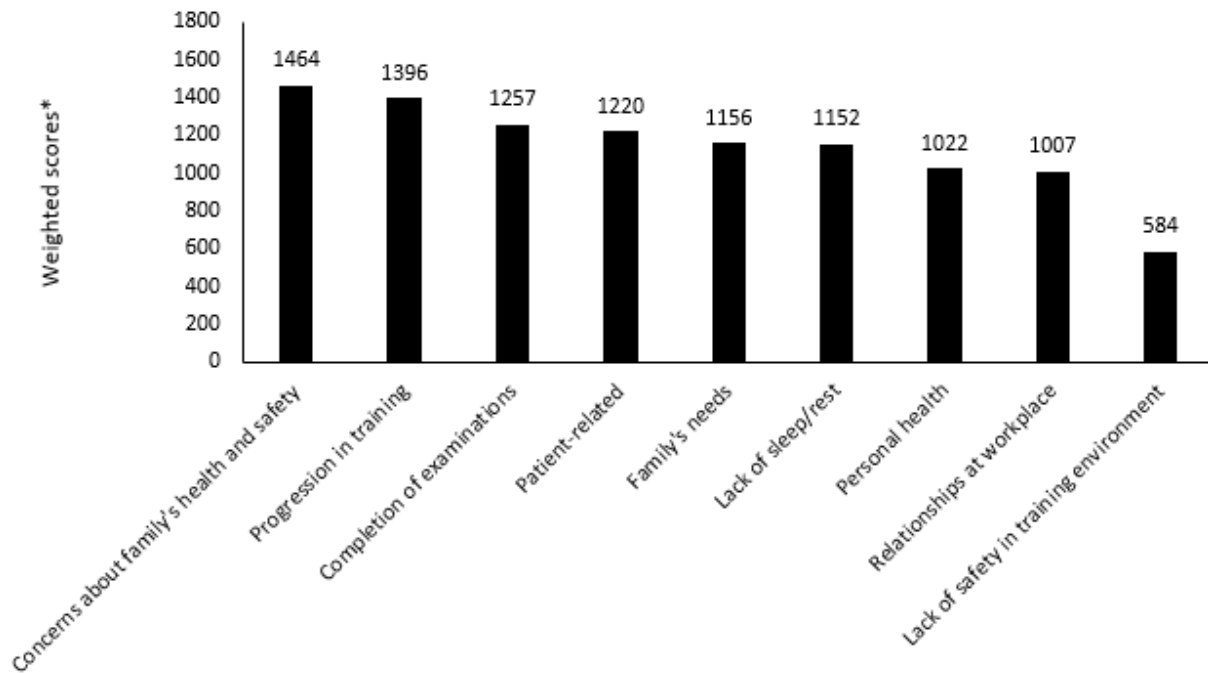

\* Stressors were ranked using a Likert scale ranging, in response to the question 'Rank in order, which factor will give rise to stress for you'. Most important stressors were scored nine and least important stressors scored one. Stressors not ranked were scored zero. Weighted scores were obtained by multiplying the number of responses with the score.

Most aggravated stressor during the pandemic

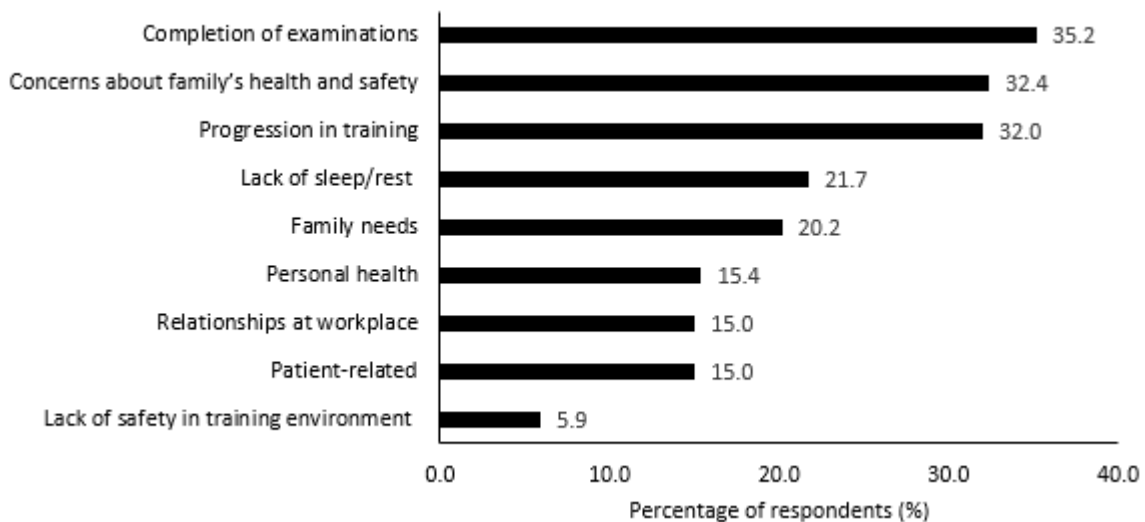

Supplement: JGMED22005691.pdf [file JGMED22005691.pdf]
